# Supplementary material for: Caffeic Acid, Quercetin and 5-Fluorocytidine-Functionalized Au-Fe3O4 Nanoheterodimers for X-ray-Triggered Drug Delivery in Breast Tumor Spheroids
Source: MDPI journal article supplement (doi:10.3390/nano11051167), 2021-04-29
Supplement: s1 [file s1]

## Supporting information

# Caffeic acid, Quercetin and 5-Fluorocytidine functionalized Au-Fe<sub>3</sub>O<sub>4</sub> Nanoheterodimers for X-Ray-Triggered drug delivery in breast tumor spheroids

Stefanie Klein <sup>1\*</sup>, Luitpold V. R. Distel <sup>2</sup>, Winfried Neuhuber <sup>3</sup> and Carola Kryschi <sup>1</sup>

<sup>1</sup> Department of Chemistry and Pharmacy, Physical Chemistry I and ICMM, Friedrich-Alexander University of Erlangen- Nuremberg, Egerlandstr. 3, D-91058 Erlangen, Germany;

[stefanie.klein@fau.de](mailto:stefanie.klein@fau.de), [carola.kryschi@fau.de](mailto:carola.kryschi@fau.de)

<sup>2</sup> Department of Radiation Oncology, Friedrich-Alexander University of Erlangen-Nuremberg, Universitätsstr. 27, D-91054 Erlangen Germany, [luitpold.distel@fau.de](mailto:luitpold.distel@fau.de)

<sup>3</sup> Institute of Anatomy and Cell Biology, Chair of Anatomy I, Friedrich Alexander University Erlangen-Nuremberg, Krankenhausstr. 9, D-91054 Erlangen, Germany, [winfried.neuhuber@fau.de](mailto:winfried.neuhuber@fau.de)

\* Correspondence: [stefanie.klein@fau.de](mailto:stefanie.klein@fau.de)

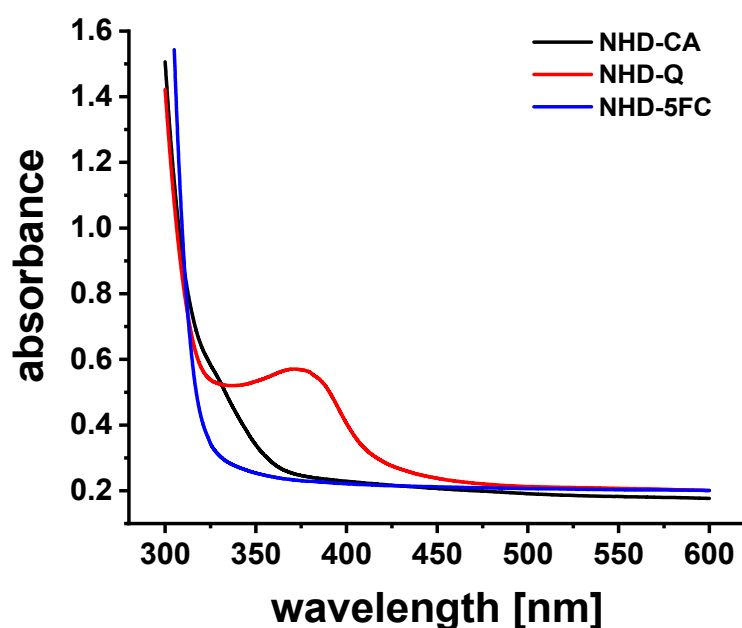

**Figure S1:** UV-Vis absorption spectra of the NHD-CA (black line), NHD-Q (red line) and NHD-5FC (blue line) dispersed at a concentration of 40 µg/mL.

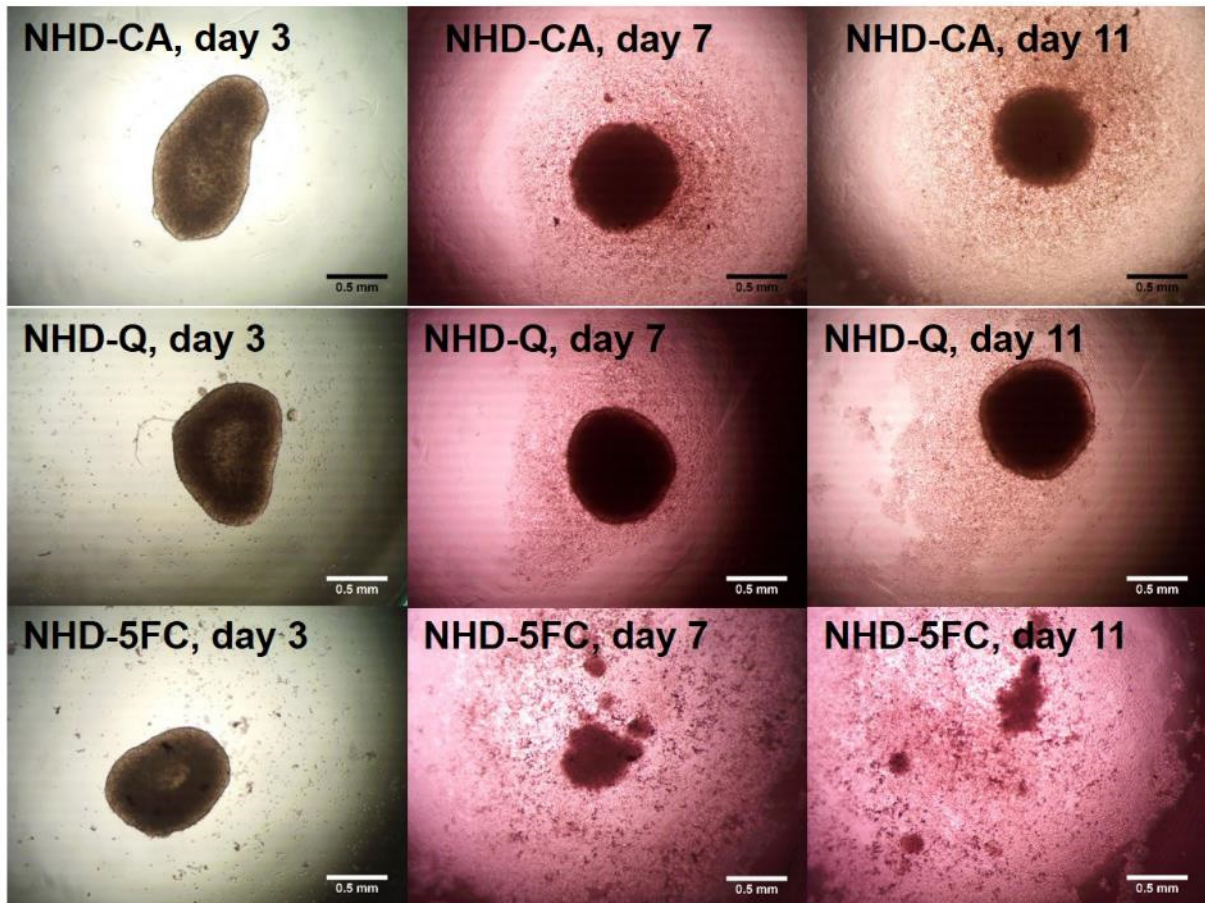

**Figure S2:** Microscope images of the MCF-7 MCTS incubated with NHD-CA (first row), NHD-Q (second row) and NHD-5FC (third row) without irradiation.

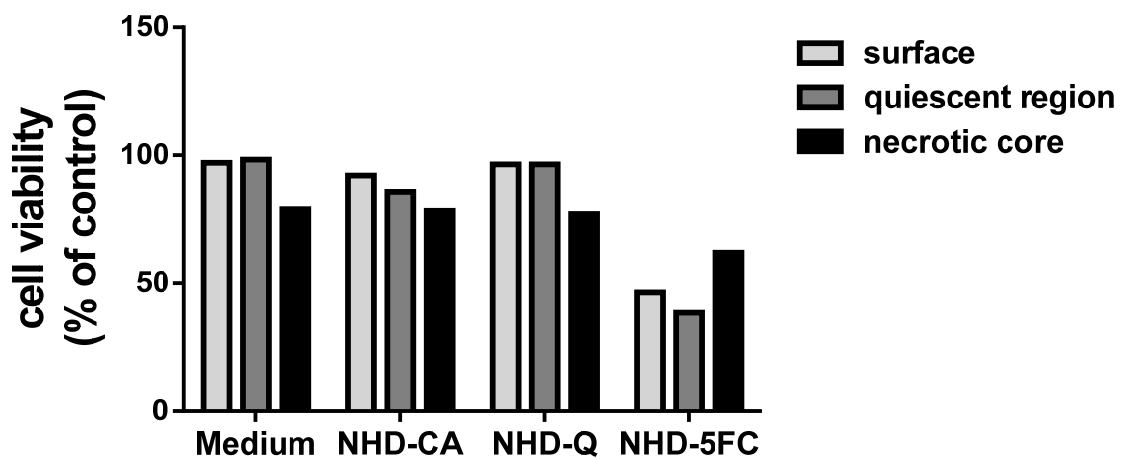

**Figure S3:** Cell viability of the MCF-7 MCTS after incubating for 72 h in NHD-free medium, and with NHD-CA, NHD-Q, and NHD-5FC; separated into the different spheroid regions.

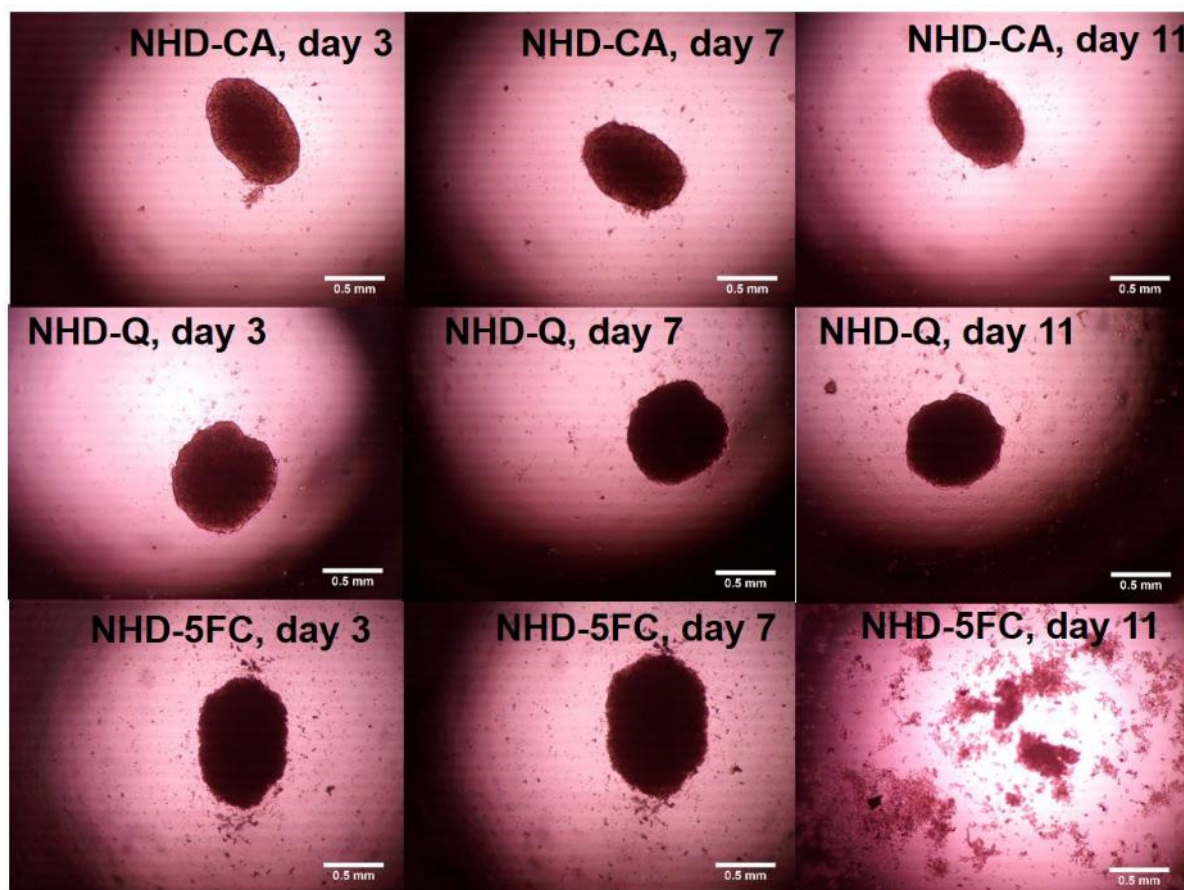

**Figure S4:** Microscope images of the MDA-MB-231 MCTS treated with NHD-CA (first row), NHD-Q (second row) and NHD-5FC (third row) without irradiation.

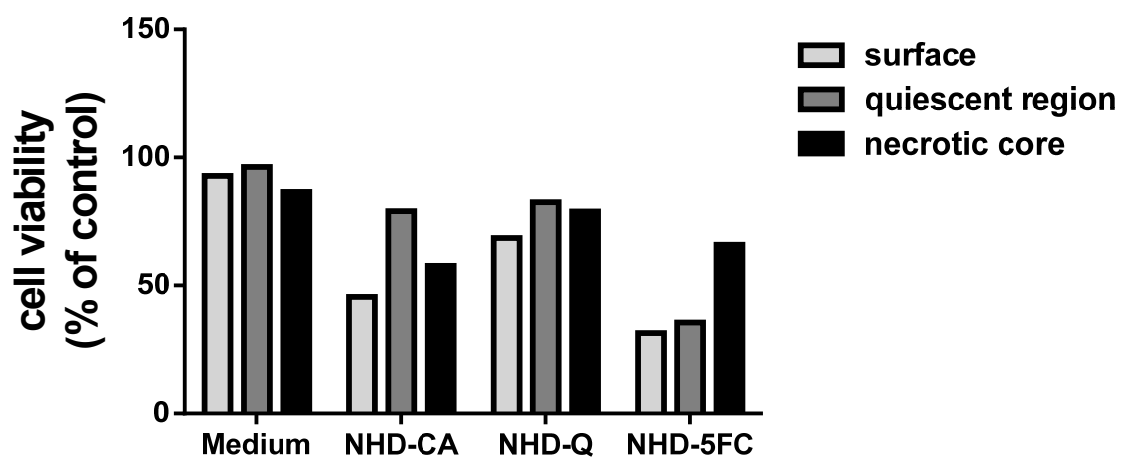

**Figure S5:** Cell viability of the MDA-MB-231 MCTS after incubation without and with the various NHDs for 72 h; separated into the different spheroid regions.



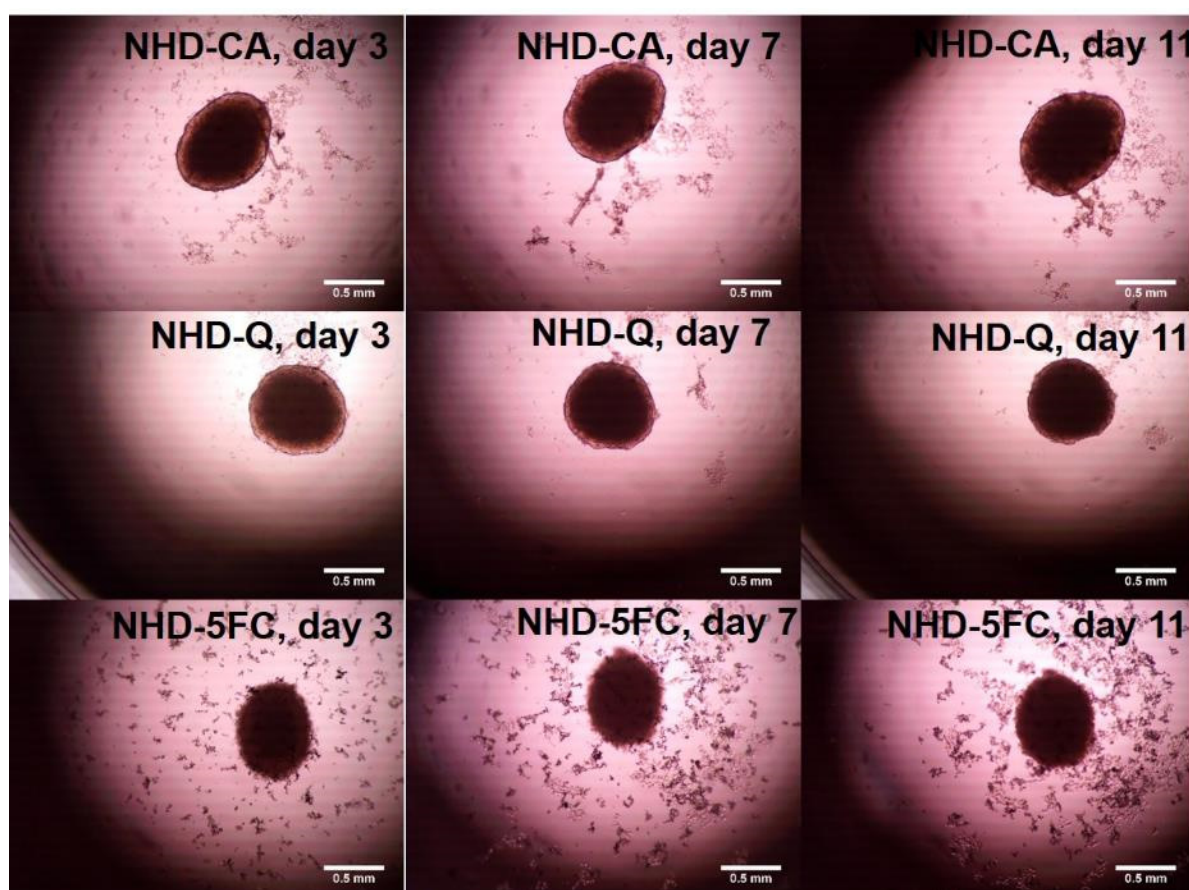

**Figure S6:** Microscope images of the MCF-10A MCS treated with NHD-CA (first row), NHD-Q (second row) and NHD-5FC (third row) without irradiation.

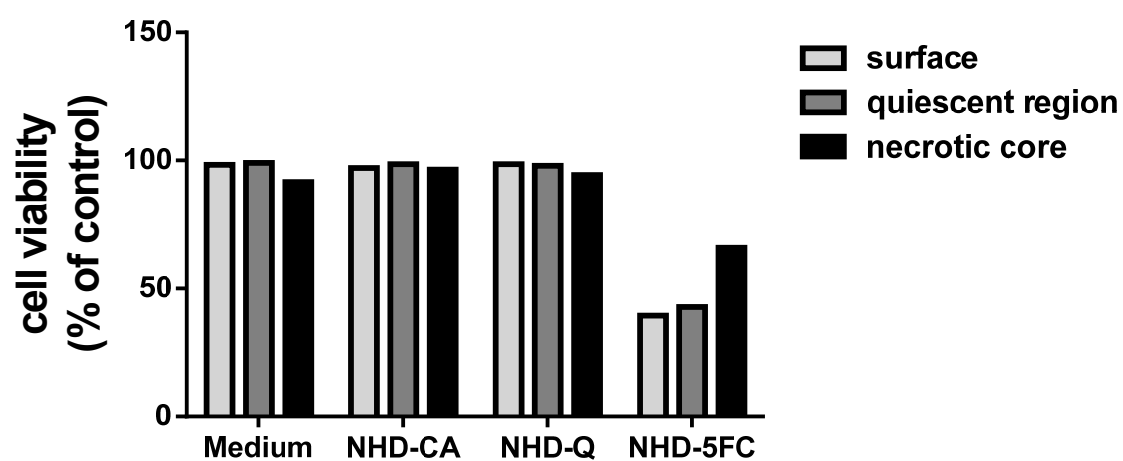

**Figure S7:** Cell viability of the MCF-10A MCS after incubation without and with the various NHDs for 72 h; separated into the different spheroid regions.

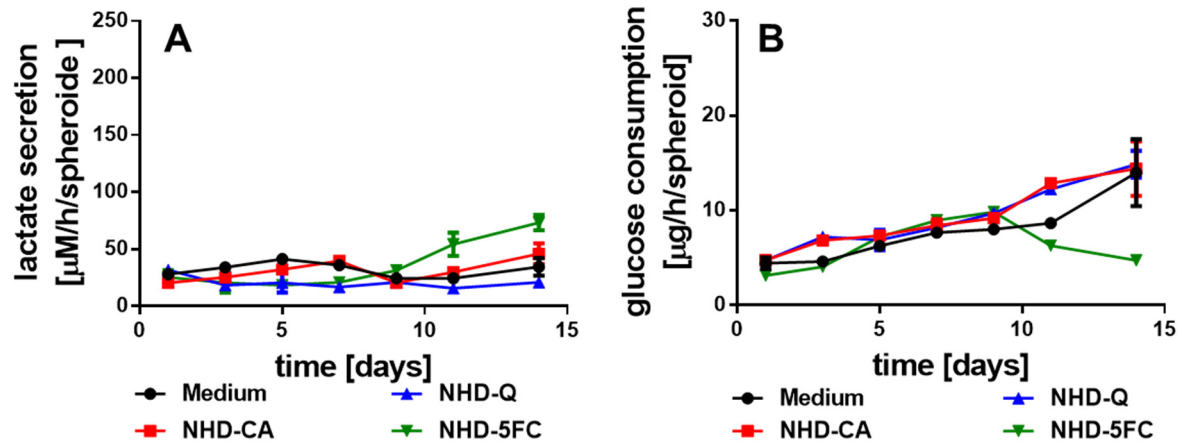

Figure S8: Lactate secretion (A) and glucose uptake (B) of the MCF-10 A MCS.

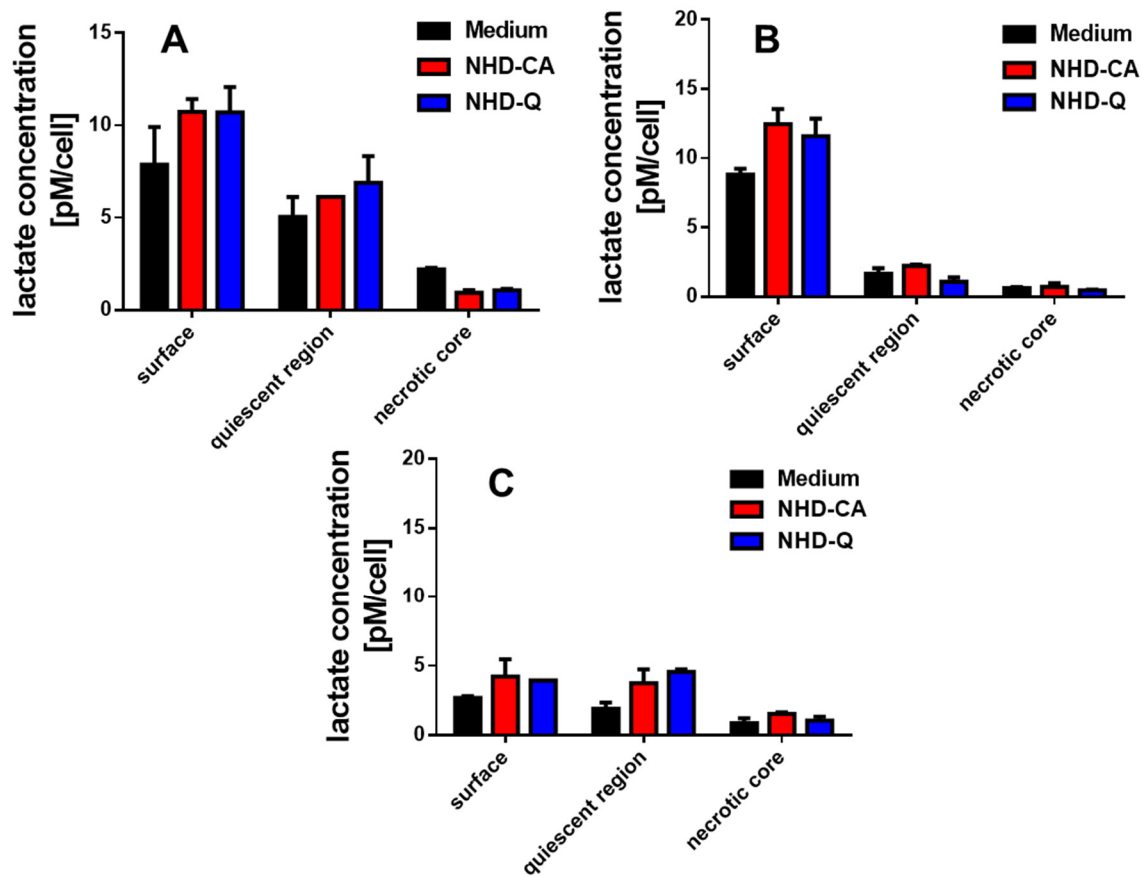

Figure S9: Intracellular lactate concentration of the different regions of the MCTS loaded with NHD-CA and NHD-Q; MCF-7 MCTS (A), MDA-MB-231 MCTS (B), MCF-10 A MCS (C).

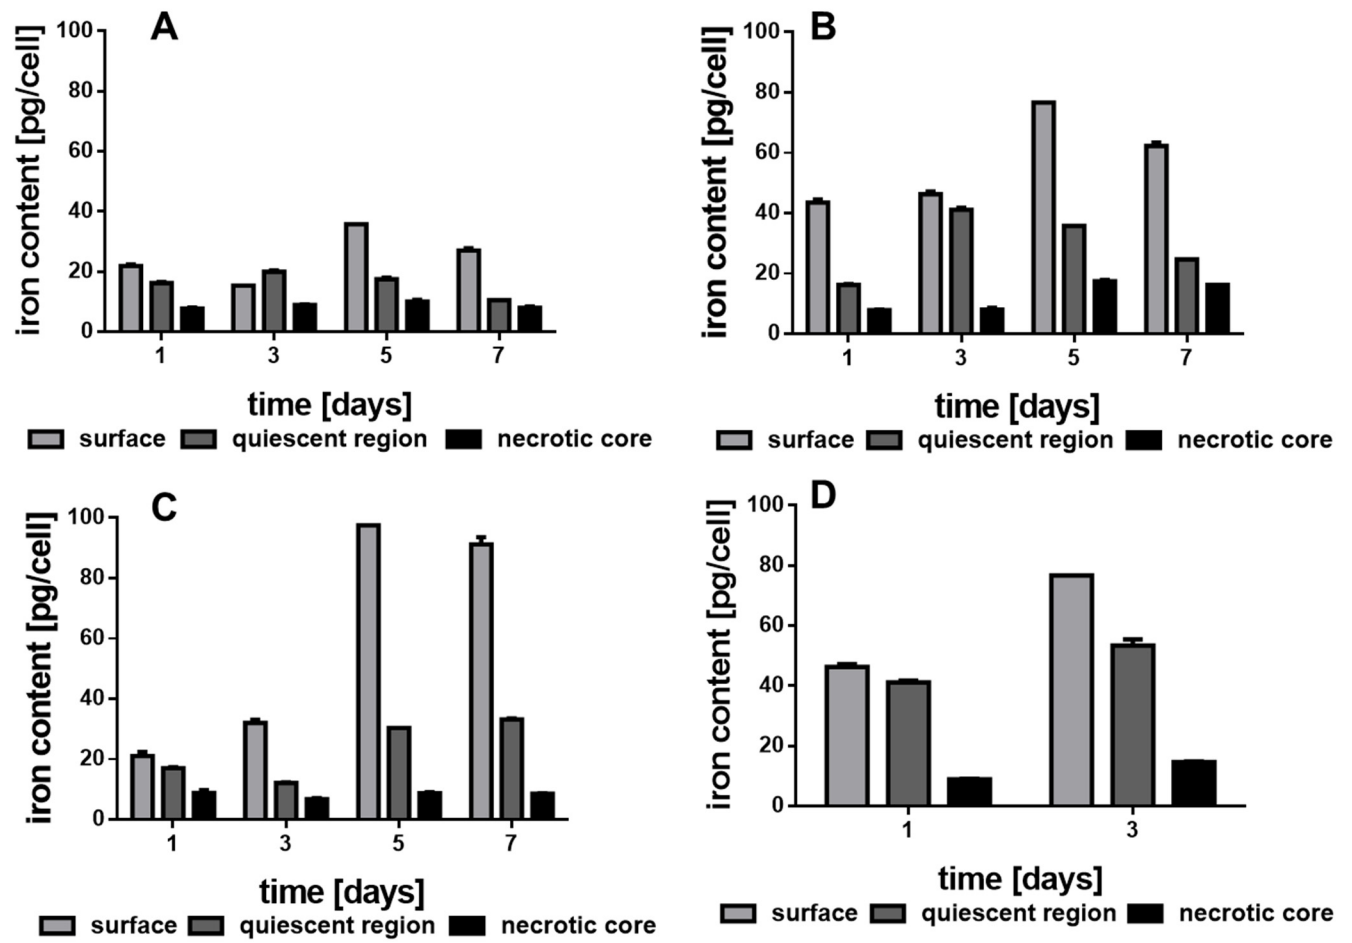

**Figure S10:** Iron content of the separated MCF-7 MCTS regions cultivated in medium (A) or in medium with NHD-CA (B), NHD-Q (C) and NHD-5FC (D).

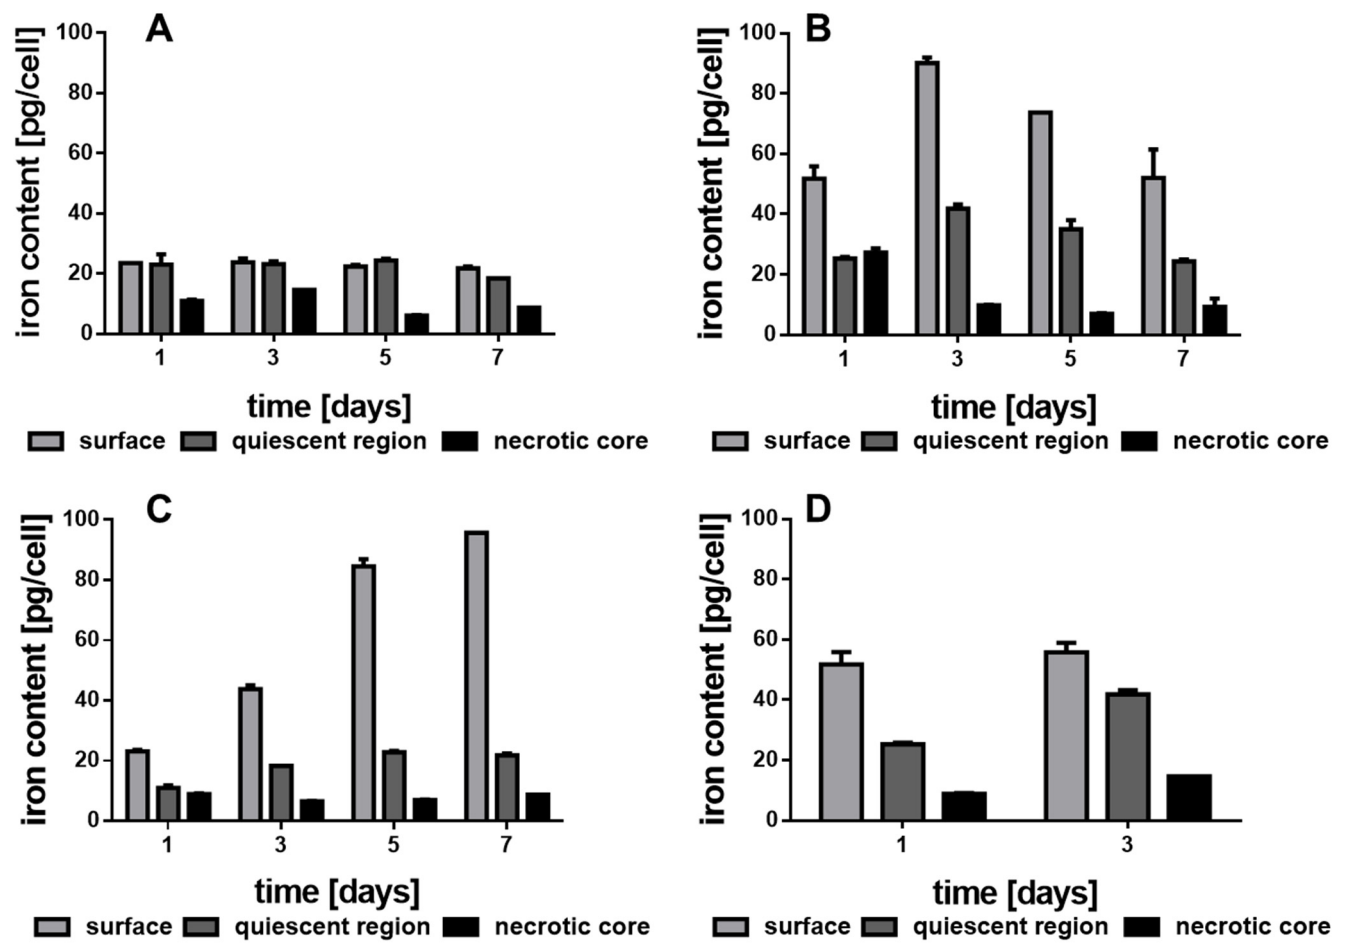

**Figure S11:** Iron content of the separated MCF-10 A MCS regions cultivated in medium (A) or in medium with NHD-CA (B), NHD-Q (C) and NHD-5FC (D).

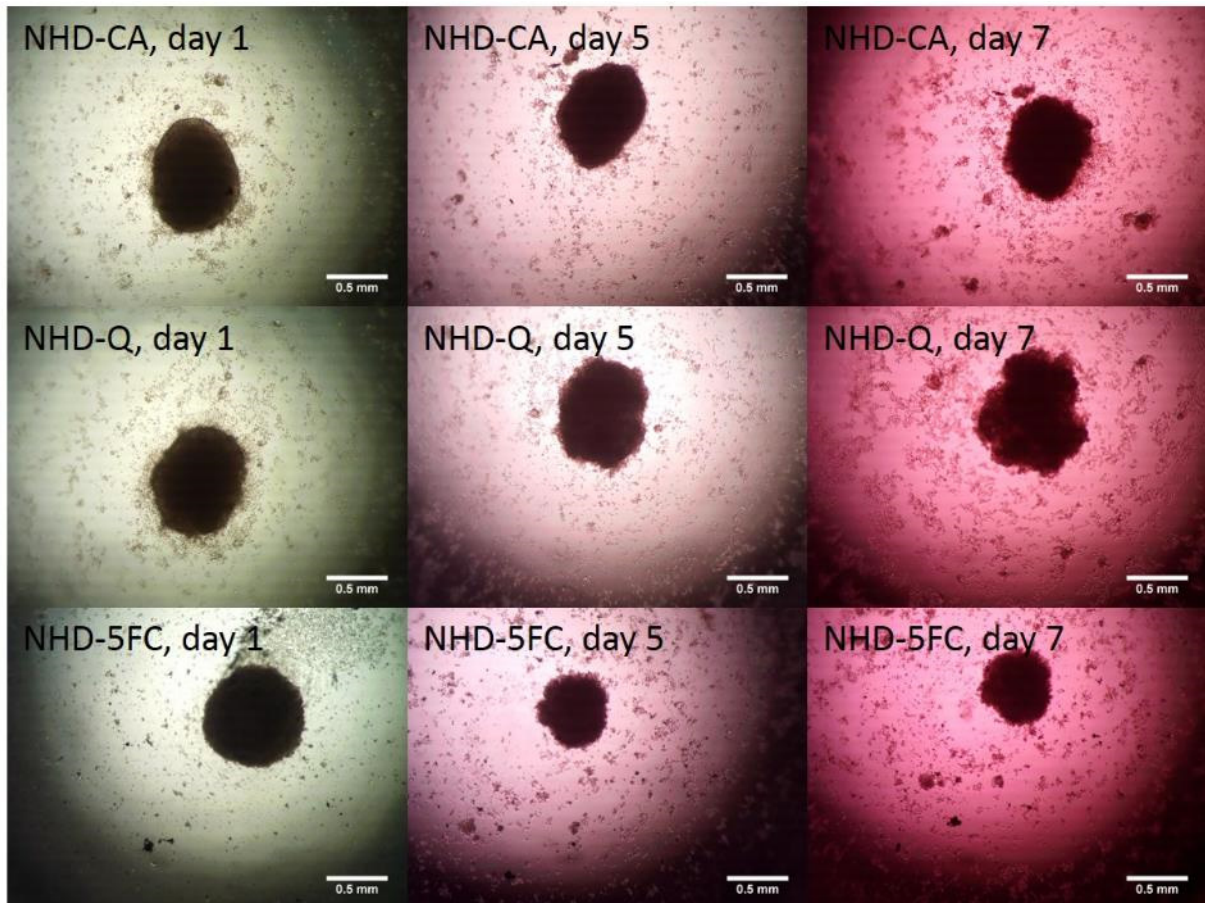

**Figure S12:** Microscope images of the MCF-7 MCTS treated with NHD-CA (first row), NHD-Q (second row) and NHD-5FC (third row) irradiated with a single dose of 10 Gy at day 1.



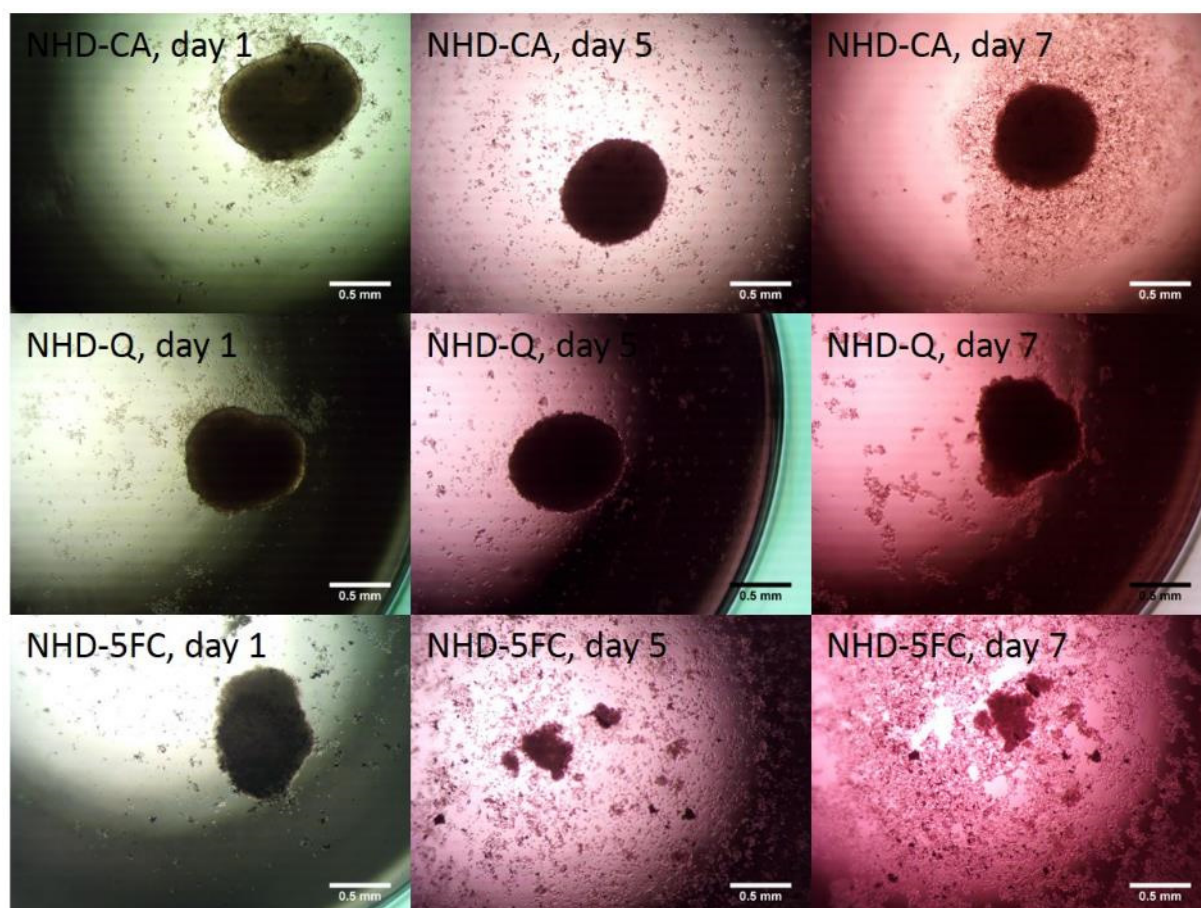

**Figure S13:** Microscope images of the MCF-7 MCTS treated with NHD-CA (first row), NHD-Q (second row) and NHD-5FC (third row) irradiated with 2 single 5 Gy doses.

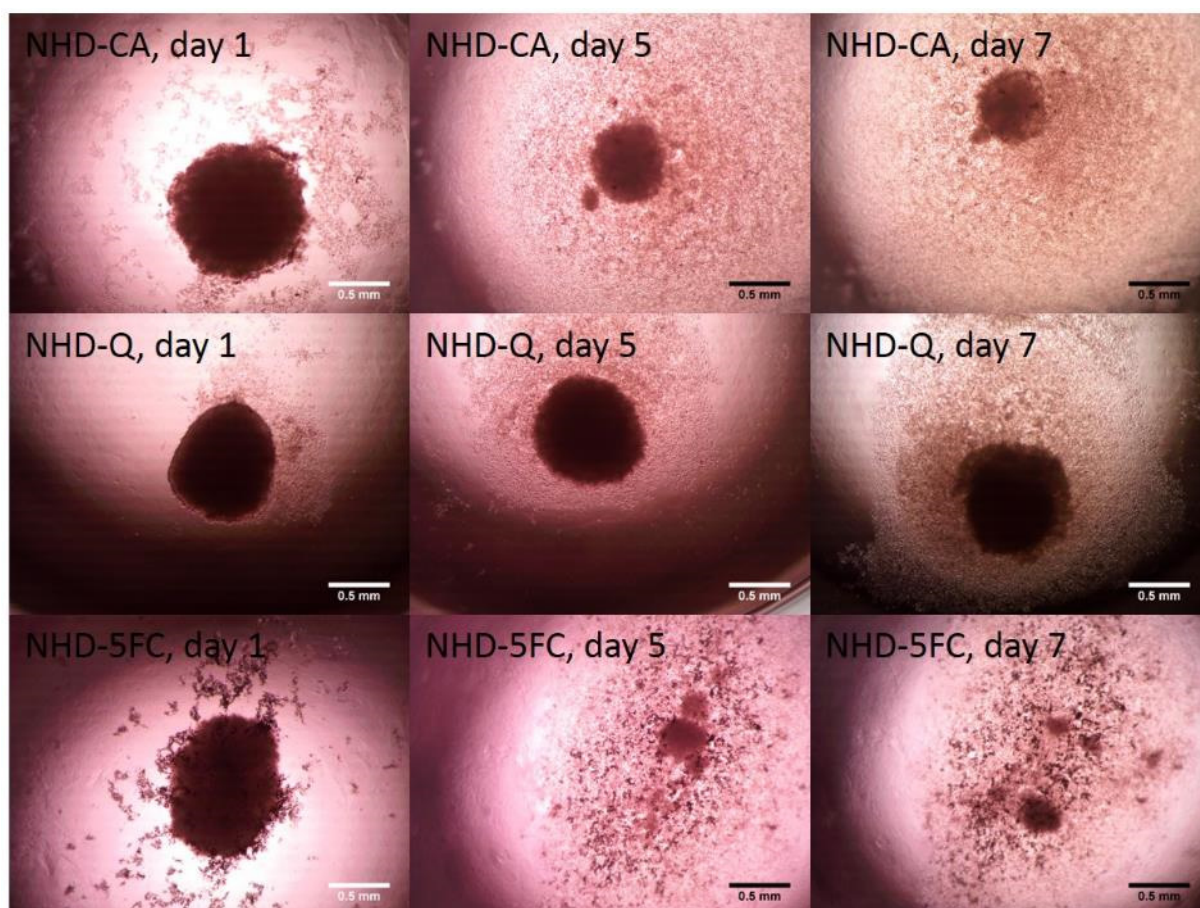

**Figure S14:** Microscope images of the MCF-7 MCTS treated with NHD-CA (first row), NHD-Q (second row) and NHD-5FC (third row) irradiated with 5 single 2 Gy doses.

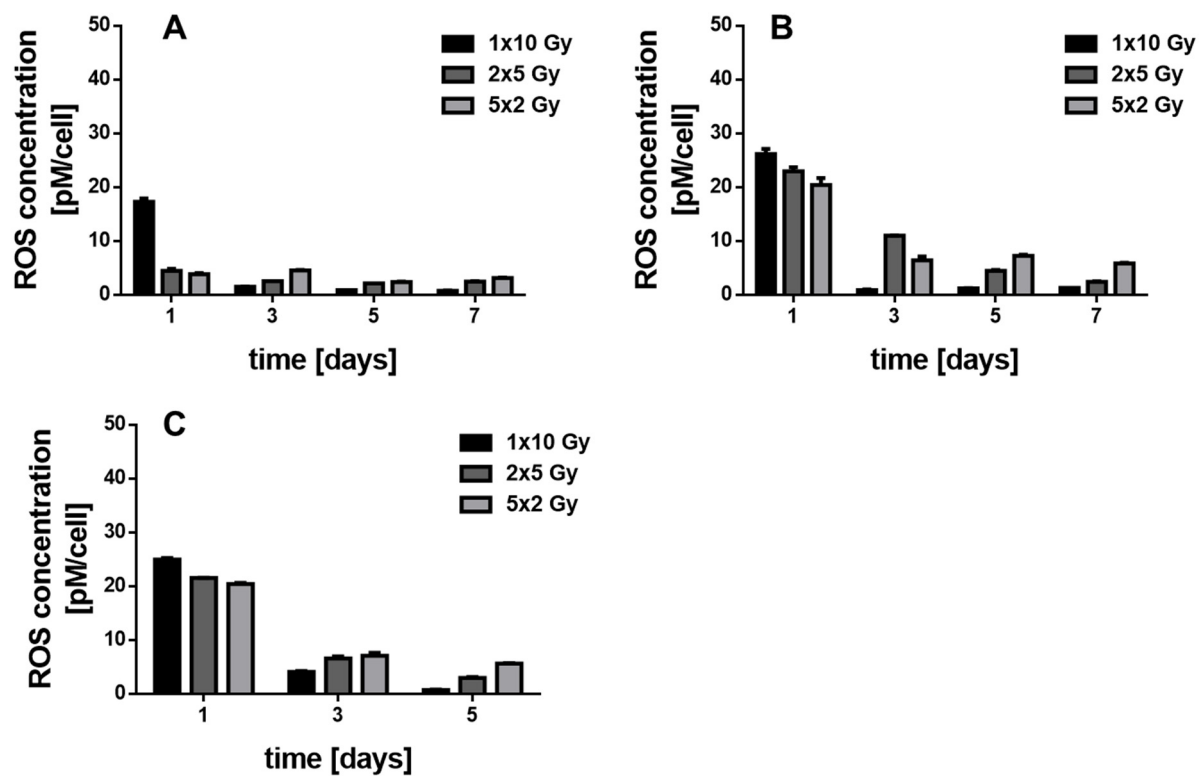

**Figure S15:** Intracellular ROS concentration in MCF-7 MCTS in medium (A) or loaded with NHD-Q (B) or NHD-5FC (C) after irradiation with a single dose of 10 Gy, 2 single 5 Gy doses, or 5 single 2 Gy doses.



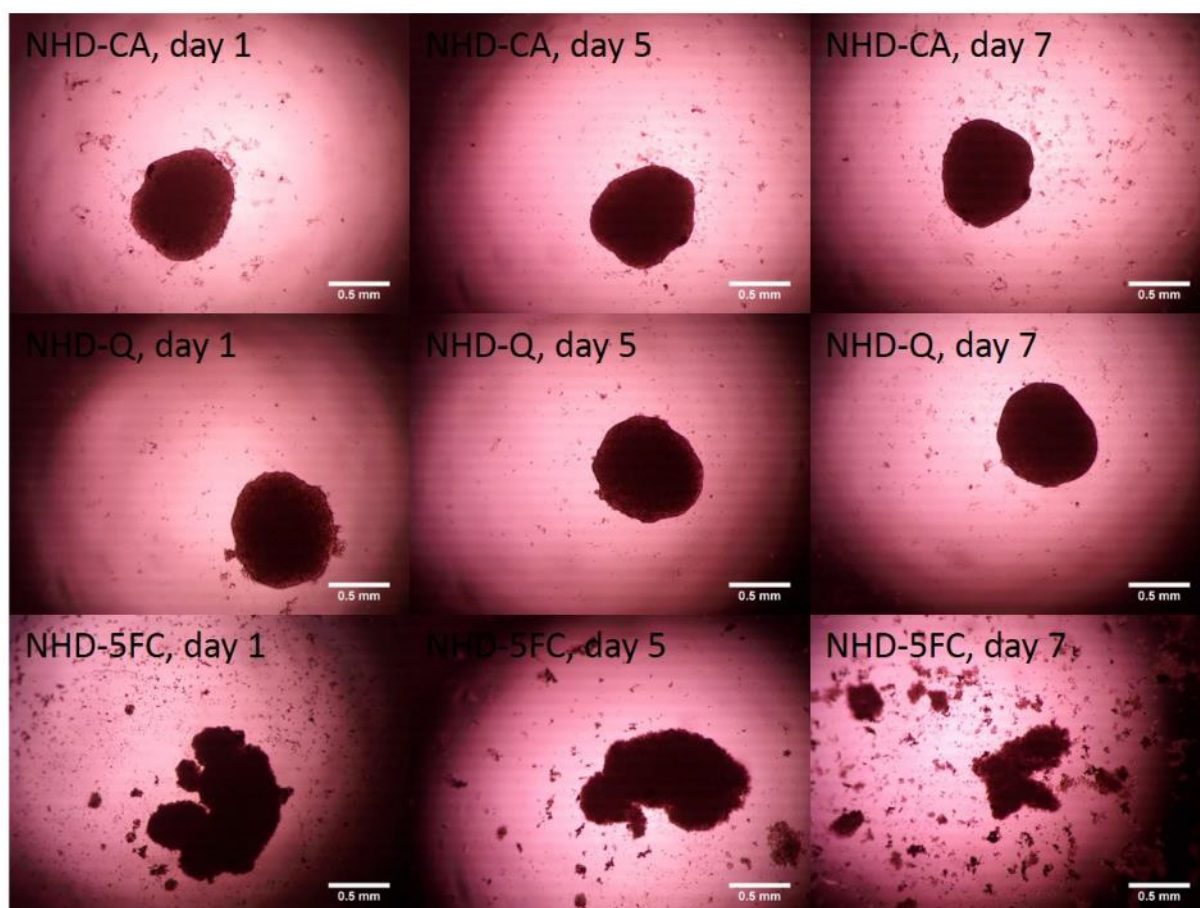

**Figure S16:** Microscope images of the MDA-MB-231 MCTS treated with NHD-CA (first row), NHD-Q (second row) and NHD-5FC (third row) irradiated with a single dose of 10 Gy at day 1.



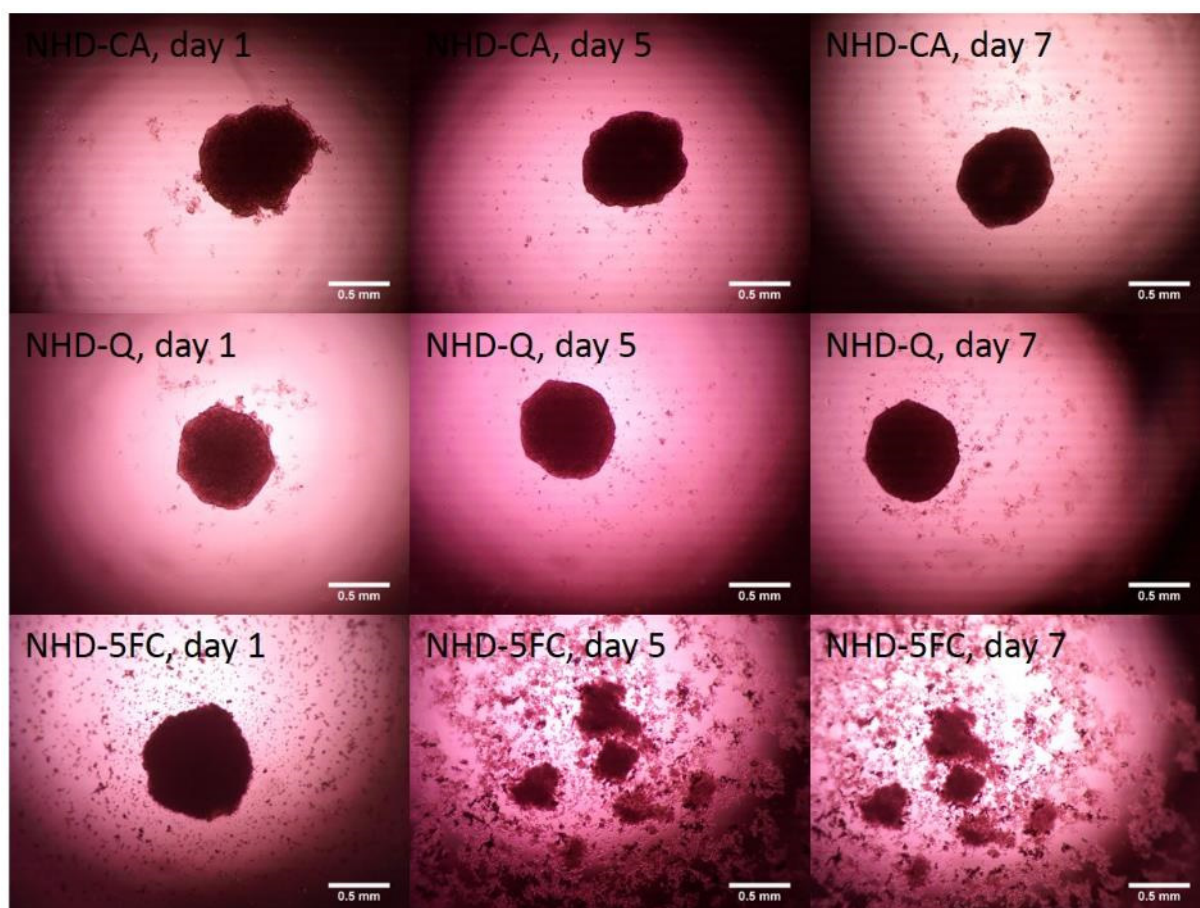

**Figure S17:** Microscope images of the MDA-MB-231 MCTS treated with NHD-CA (first row), NHD-Q (second row) and NHD-5FC (third row) irradiated with 2 single 5Gy doses from day 1 to 2.

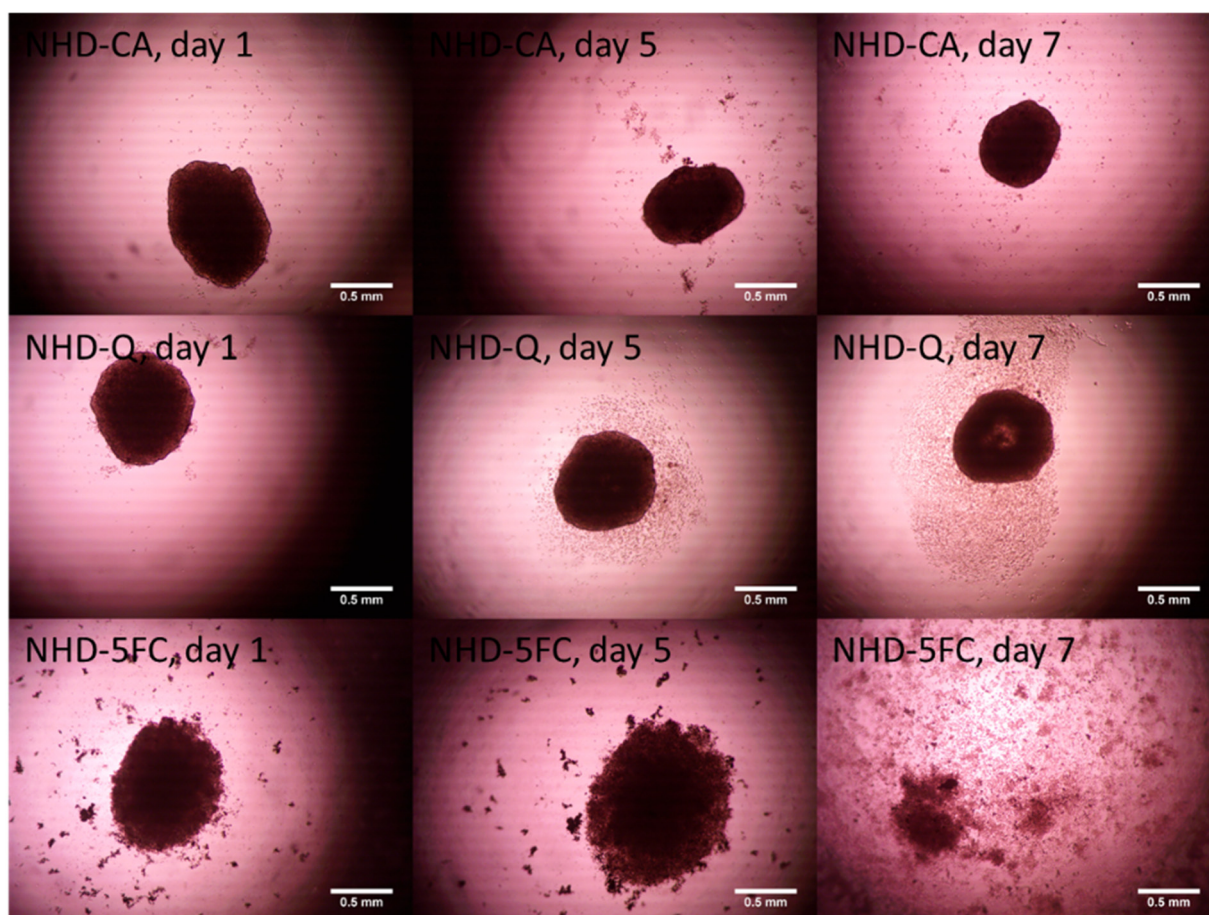

**Figure S18:** Microscope images of the MDA-MB-231 MCTS treated with NHD-CA (first row), NHD-Q (second row) and NHD-5FC (third row) irradiated with 5 single 2 Gy doses from day 1 to 5.

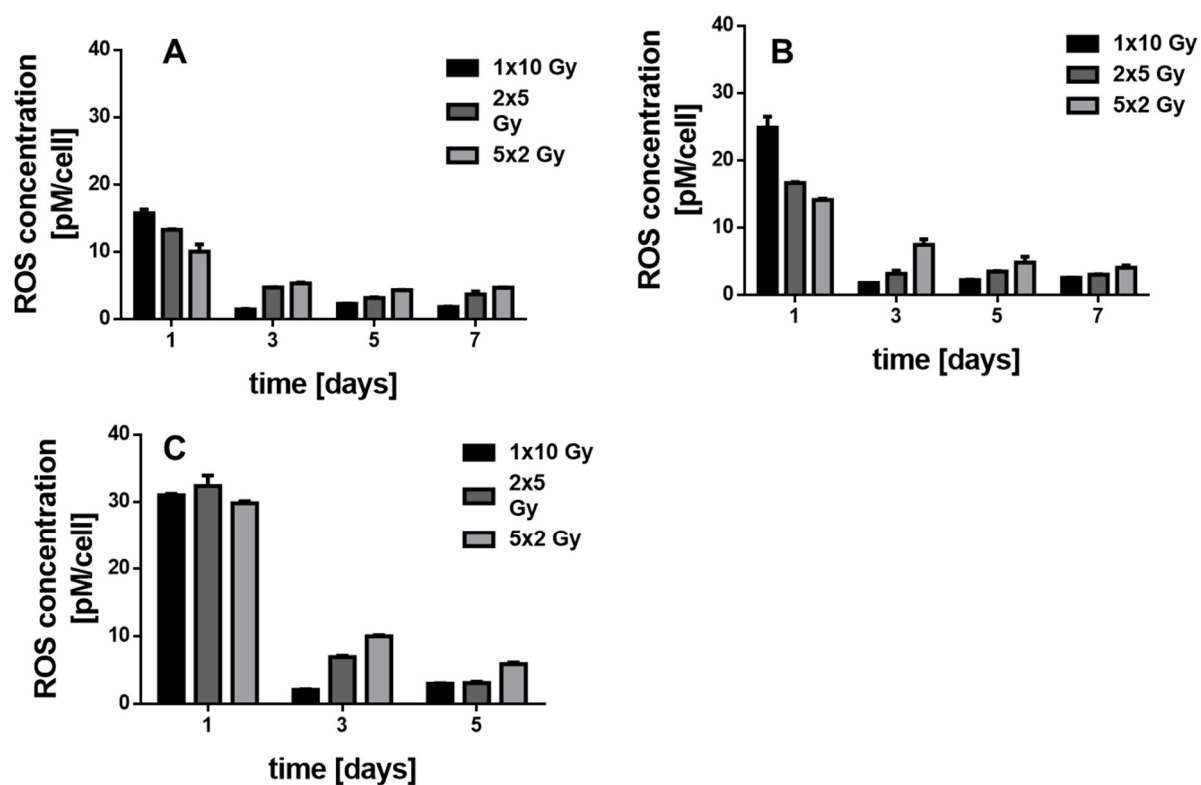

**Figure S19:** Intracellular ROS concentration in MDA-MD-231 MCTS in medium (A) or loaded with NHD-Q (B) or NHD-5FC (C) after irradiation with a single dose of 10 Gy, 2 single 5 Gy doses, or 5 single 2 Gy doses.



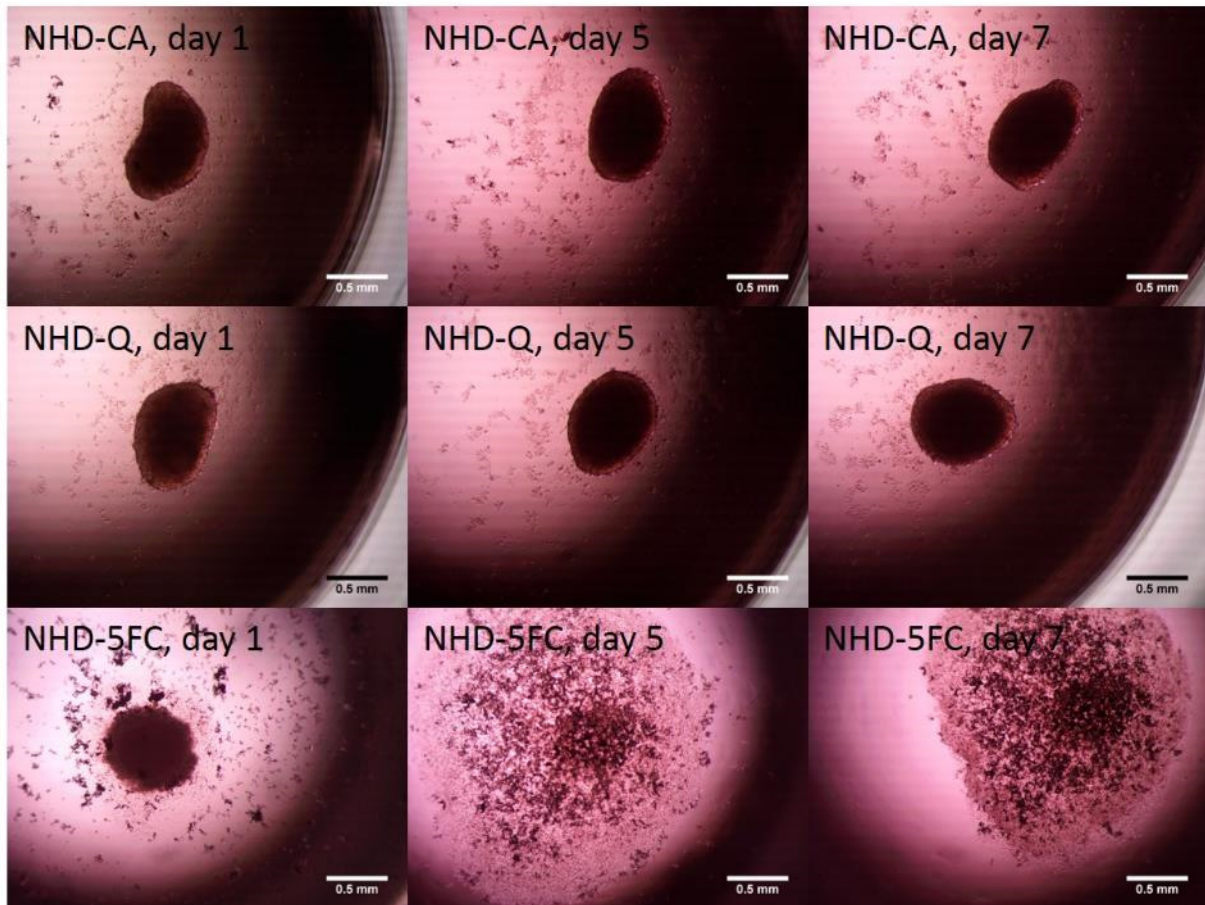

**Figure S20:** Microscope images of the MCF-10 A MCS treated with NHD-CA (first row), NHD-Q (second row) and NHD-5FC (third row) irradiated with a single dose of 10 Gy at day 1.



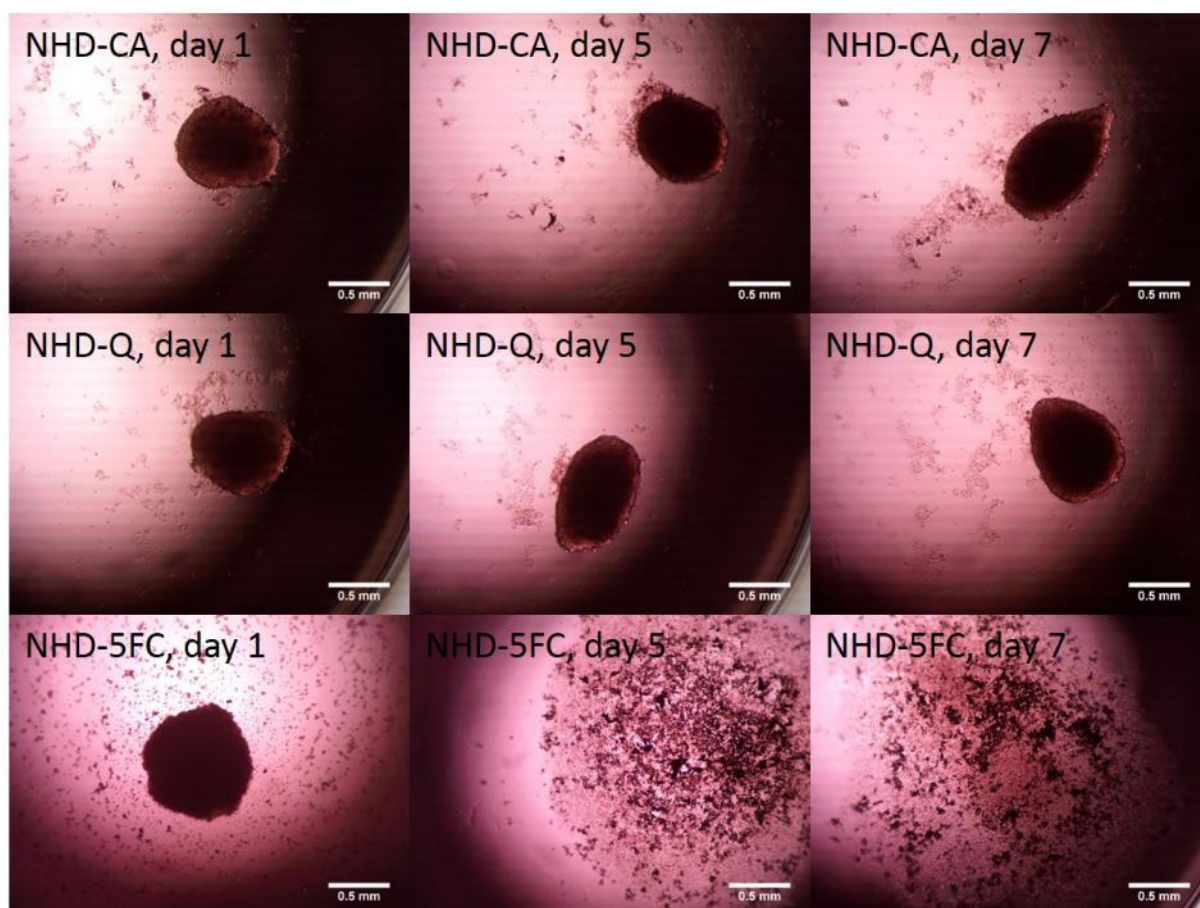

**Figure S21:** Microscope images of the MCF-10 A MCS treated with NHD-CA (first row), NHD-Q (second row) and NHD-5FC (third row) irradiated with 5 single doses of 2 Gy from day 1 to 2.

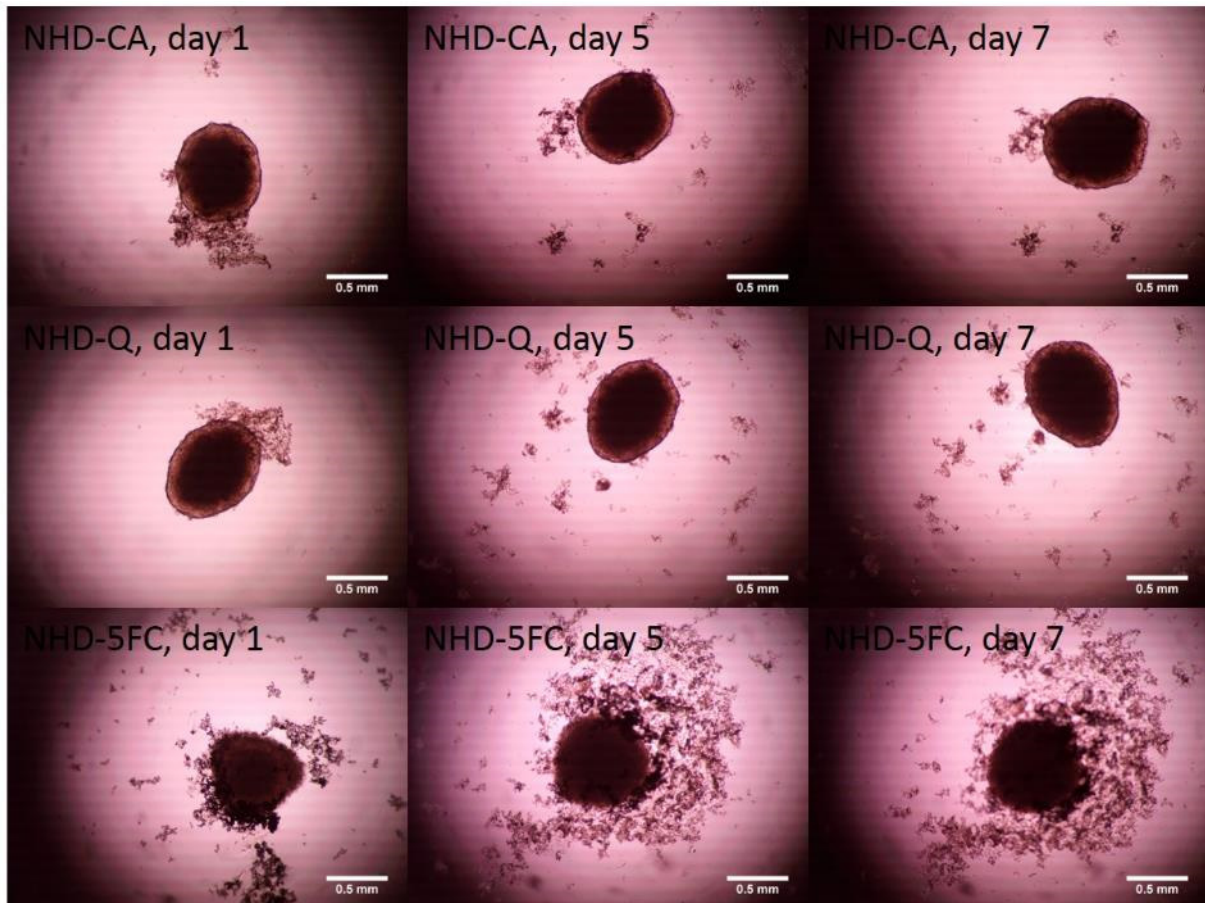

**Figure S22:** Microscope images of the MCF-10 A MCS treated with NHD-CA (first row), NHD-Q (second row) and NHD-5FC (third row) irradiated with 5 single doses of 2 Gy from day 1 to 5.
